## Notch2, but not Notch1, is required for proximal fate acquisition in the mammalian nephron

Hui-Teng Cheng, Mijin Kim, M. Todd Valerius, Kameswaran Surendran, Karin Schuster-Gossler, Achim Gossler, Andrew P. McMahon and Raphael Kopan

There was an error published in *Development* **134**, 801-811.

On p. 802, Engleka et al. (2005) was mistakenly cited. The text should have read 'We crossed *Pax3-cre<sup>tg/+</sup>;N2<sup>fl/+</sup>* (floxed *Notch2*)/+ males (Li et al., 2000) to *N2<sup>fl/f</sup>* females to obtain *Pax3-cre<sup>tg/+</sup>;N2<sup>fl/f</sup>* embryos or pups'.

The authors apologise to readers for this mistake.
